# Supplementary material
Source: PubMed Central journal article supplement (PMC4873455)
Supplement: NIHMS785900-supplement-Supplemental_Material.pdf [file NIHMS785900-supplement-Supplemental_Material.pdf]

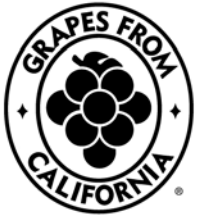

CALIFORNIA  
TABLE GRAPE  
COMMISSION

392 W. Fallbrook,  
Suite 101  
Fresno, California  
93711-6150  
phone: 559.447.8350  
fax: 559.447.9184  
[grapesfromcalifornia.com](http://grapesfromcalifornia.com)

## California Table Grape Commission Freeze-Dried Table Grape Powder Analysis Report (Y2010)

4/11

### **Fresh grapes**

Fresh grapes contain about 82% water, 12-18% sugar, and 0.2-0.8% acid, mainly tartaric and malic acid. Grapes also contain numerous phenolic compounds, including simple phenols, simple phenolic acids, cinnamic acids, stilbenes, flavonoids, flavans, flavonols, and anthocyanins. A standard serving size of fresh grapes is approximately 3/4 cup (126 grams).

Grapes are high in flavonoids and are particularly good sources of flavans. For example, the major phenolic compound in grapes is catechin, and they contain epicatechin, gallo catechin, and epigallocatechin. Grapes also contain high concentrations of leucoanthocyanidin flavans of varied structure. Grapes are good sources of flavonols, primarily quercetin. Red and black grapes contain high amounts of anthocyanins.

### **Freeze-dried grape powder**

The freeze-dried grape powder is to be used for research purposes only. It is a composite of fresh red, green and black California grapes (seeded and seedless varieties), that have been frozen, ground with food-quality dry ice, freeze-dried, and re-ground using Good Manufacturing Practices for food products throughout. The powder was processed and stored to preserve the integrity of the biologically-active compounds found in fresh grapes. As with fresh grapes, the powder is known to contain resveratrol, flavans (including catechin), flavonols (including quercetin), anthocyanins and simple phenolics.

To estimate the amount of fresh grapes represented by the powdered preparation, moisture content must be taken into account. The dry powder contains approximately 1% moisture and fresh grapes contain approximately 82% moisture. Therefore, 100 grams of fresh grapes corresponds to approximately 18.2 grams powder. The powder is hygroscopic and should be stored in moisture-proof containers at -70°C.

**Phytochemical Analysis of Freeze-Dried Table Grape Powder (Y2010)**

4/11

| <b>Compounds</b>                                    | <b>Total</b> | <b>Individual</b> |
|-----------------------------------------------------|--------------|-------------------|
| <b>Catechins</b>                                    | 46.9 mg/kg   |                   |
| Catechin                                            |              | 23.9 mg/kg        |
| Epicatechin                                         |              | 23.0 mg/kg        |
| <b>Anthocyanins</b>                                 | 458.9 mg /kg |                   |
| Peonidin                                            |              | 45.7 mg/kg        |
| Cyanidin                                            |              | 263.8 mg/kg       |
| Malvidin                                            |              | 149.4 mg/kg       |
| <b>Flavonols</b>                                    |              |                   |
| Quercetin                                           |              | 71.3 mg/kg        |
| Kaempferol                                          |              | 5.43 mg/kg        |
| Isorhamnetin                                        |              | 11.5 mg/kg        |
| <b>Stilbenes</b>                                    |              |                   |
| Resveratrol                                         |              | .70 mg/kg         |
|                                                     |              |                   |
| <b>Total Polyphenols</b> in gallic acid equivalents |              | 495 mg/100g       |

Note: The following analysis does not represent the complete phytochemical profile of grapes

**Nutrient Analysis of Freeze-Dried Table Grape Powder (Y2010)**

4/11

| <b>Nutrient</b>            | <b>Amount<br/>(per 100 g powder)</b> | <b>Units</b> |
|----------------------------|--------------------------------------|--------------|
| Calories                   | 370                                  | kcal         |
| Total Fat, acid hydrolysis | .421                                 | g            |
| Total Carbohydrate         | 88.3                                 | g            |
| Protein (N x 6.25)         | 3.21                                 | g            |
| Beta carotene              | .206                                 | mg           |
| Vitamin A from carotene    | 343                                  | IU           |
| Vitamin C                  | 2.6                                  | mg           |
| Calcium                    | 51.1                                 | mg           |
| Iron                       | 1.29                                 | mg           |
| Sodium                     | 14.1                                 | mg           |
| Potassium                  | 905                                  | mg           |
| Thiamin HCl                | .17                                  | mg           |
| Folic Acid                 | 26.8                                 | mcg          |
| Phosphorus                 | 117.0                                | mg           |
| Magnesium                  | 32.4                                 | mg           |
| Zinc                       | .260                                 | mg           |
| Copper                     | .352                                 | mg           |
| Manganese                  | .293                                 | mg           |
| Moisture                   | 5.10                                 | g            |
| Ash                        | 2.95                                 | g            |

Note: Nutrient analyses were performed using standard methods of analysis. References available upon request.

**Microbiological Analysis of Freeze-Dried Table Grape Powder (Y2010)**

5/11

| <b>Microorganism Analyzed</b>    | <b>Result</b> | <b>Units</b> |
|----------------------------------|---------------|--------------|
| Aerobic plate count              | 1400          | CFU/g        |
| Anaerobic plate count            | 920           | CFU/g        |
| Bacillus Cereus                  | 0 – 1400      | CFU/g        |
| Clostridium P.                   | <10           | CFU/g        |
| Coliform                         |               |              |
| <i>E. coli</i>                   | <10           | CFU/g        |
| Total Coliforms                  | < 3           | MPN          |
| Listeria                         | Negative/25g  | +/-          |
| <i>Salmonella</i> (rapid method) | Negative/25g  | +/-          |
| Staphylococcus Aureus            | <10           | CFU/g        |
| Yeast and mold count             | 65            | CFU/g        |
